## Errata

Anthony Nicolas, Kamel Mohammedi, Jean-Philippe Bastard, Soraya Fellahi, Naima Bellili-Muñoz,  
Ronan Roussel, Samy Hadjadj, Michel Marre, Gilberto Velho, Frédéric Fumeron

T-cadherin gene variants are associated with nephropathy in subjects with type 1 diabetes. *Nephrol Dialy Transplant*, gfx071.  
doi: 10.1093/ndt/gfx071

In the published version of this article there are errors within the abstract.

In the sentence “rs11646213 [odds ratio (OR) 1.47; 95% confidence interval (CI) 1.18–1.85; P = 0.0009] and rs3865188 (OR 0.71; 95% CI 0.57–0.90; P = 0.004) were associated with high baseline prevalence of established/advanced DN” the word “high” has been removed.

In the sentence “In SURGENE, rs11646213 [hazard ratio (HR) 1.69; 95% CI 1.01–2.71; P = 0.04] and rs3865188 (HR 0.74; 95% CI 0.55–0.99; P = 0.04) were associated with an excess risk of renal events (defined as progression to more severe DN stages)” the words “an excess” have been removed.

The authors apologize for the error.

doi: 10.1093/ndt/gfx290  
Advance Access publication 18 October 2017

---

Ming-Yang Chang and Albert C.M. Ong

Targeting new cellular disease pathways in autosomal dominant polycystic kidney disease. *Nephrol Dial Transplant* 2017 gfx262.  
doi: 10.1093/ndt/gfx262

In the original published version of this article numerous references to *PKD*, *Pkd* and *pkd* were incorrectly formatted. These have been corrected to the appropriate upper and lower case variations. The publisher apologises for this error which has been corrected.

doi: 10.1093/ndt/gfx289  
Advance Access publication 25 October 2017
